# Supplementary material
Source: publisher figshare collection journal article supplement (https://diabetesjournals.figshare.com/articles/dataset/_/21039004)
Supplement: Supplementary file 1 [file 1]

Educational attainment and childhood onset type 1 diabetes: Online-Only Supplemental Materials

Supplemental Figure 1: Sensitivity analysis showing models of standardised school attainment by binary type 1 diabetes status and HbA1c quintile, where both models additionally control for school absence.

Supplemental Figure 2: Sensitivity analysis showing models of standardised school attainment by binary type 1 diabetes status and HbA1c quintile, where both models additionally control for prior attainment and restrict the type 1 diabetes cases to only those diagnosed in the period between prior attainment and final attainment measures.

Supplemental Figure 3: Sensitivity analysis showing models of standardised school attainment by HbA1c quintile, where the left panel includes no adjustment for SES, and the right panel adjusts for both household and neighbourhood deprivation
